# Supplementary material for: A small molecule interacts with VDAC2 to block mouse BAK-driven apoptosis
Source: Springer Nature journal article supplement (doi:10.1038/s41589-019-0365-8), 2019-10-07
Supplement: 41589_2019_365_MOESM18_ESM.mol [file 41589_2019_365_MOESM18_ESM.mol]

nchembio.A160603917E-comp7.mol
  ChemDraw08111922522D

 47 52  0  0  0  0  0  0  0  0999 V2000
   -1.8989    1.7268    0.0000 C   0  0  0  0  0  0  0  0  0  0  0  0
   -1.8989    0.9018    0.0000 C   0  0  0  0  0  0  0  0  0  0  0  0
   -1.1844    0.4893    0.0000 C   0  0  0  0  0  0  0  0  0  0  0  0
   -0.4700    0.9018    0.0000 C   0  0  0  0  0  0  0  0  0  0  0  0
   -0.4700    1.7268    0.0000 C   0  0  0  0  0  0  0  0  0  0  0  0
   -1.1844    2.1394    0.0000 C   0  0  0  0  0  0  0  0  0  0  0  0
    0.2445    0.4893    0.0000 S   0  0  0  0  0  0  0  0  0  0  0  0
    0.9590    0.9018    0.0000 C   0  0  0  0  0  0  0  0  0  0  0  0
    0.9590    1.7268    0.0000 C   0  0  0  0  0  0  0  0  0  0  0  0
    0.2445    2.1394    0.0000 C   0  0  0  0  0  0  0  0  0  0  0  0
   -0.3388   -0.0940    0.0000 O   0  0  0  0  0  0  0  0  0  0  0  0
    0.8277   -0.0940    0.0000 O   0  0  0  0  0  0  0  0  0  0  0  0
    1.5720    2.2786    0.0000 C   0  0  0  0  0  0  0  0  0  0  0  0
    1.2363    3.0326    0.0000 C   0  0  0  0  0  0  0  0  0  0  0  0
    0.4158    2.9461    0.0000 S   0  0  0  0  0  0  0  0  0  0  0  0
    1.6488    3.7465    0.0000 C   0  0  0  0  0  0  0  0  0  0  0  0
    1.2363    4.4609    0.0000 O   0  0  0  0  0  0  0  0  0  0  0  0
    2.4738    3.7465    0.0000 N   0  0  0  0  0  0  0  0  0  0  0  0
    2.8863    3.0326    0.0000 C   0  0  0  0  0  0  0  0  0  0  0  0
    3.7114    3.0326    0.0000 C   0  0  0  0  0  0  0  0  0  0  0  0
    4.1239    2.3181    0.0000 C   0  0  0  0  0  0  0  0  0  0  0  0
    4.9483    2.3181    0.0000 C   0  0  0  0  0  0  0  0  0  0  0  0
    5.3609    3.0326    0.0000 C   0  0  0  0  0  0  0  0  0  0  0  0
    4.9483    3.7465    0.0000 C   0  0  0  0  0  0  0  0  0  0  0  0
    4.1239    3.7465    0.0000 C   0  0  0  0  0  0  0  0  0  0  0  0
   -2.6133    0.4893    0.0000 C   0  0  0  0  0  0  0  0  0  0  0  0
    6.1859    3.0326    0.0000 C   0  0  0  0  0  0  0  0  0  0  0  0
   -3.3278    0.9018    0.0000 C   0  0  0  0  0  0  0  0  0  0  0  0
   -4.0423    0.4893    0.0000 C   0  0  0  0  0  0  0  0  0  0  0  0
   -4.0423   -0.3357    0.0000 C   0  0  0  0  0  0  0  0  0  0  0  0
   -3.3278   -0.7483    0.0000 C   0  0  0  0  0  0  0  0  0  0  0  0
   -2.6133   -0.3357    0.0000 C   0  0  0  0  0  0  0  0  0  0  0  0
   -1.8989   -0.7483    0.0000 C   0  0  0  0  0  0  0  0  0  0  0  0
   -1.1844   -0.3357    0.0000 O   0  0  0  0  0  0  0  0  0  0  0  0
   -1.8989   -1.5733    0.0000 C   0  0  0  0  0  0  0  0  0  0  0  0
   -2.6133   -1.9858    0.0000 C   0  0  0  0  0  0  0  0  0  0  0  0
   -2.6133   -2.8109    0.0000 C   0  0  0  0  0  0  0  0  0  0  0  0
   -1.8989   -3.2234    0.0000 C   0  0  0  0  0  0  0  0  0  0  0  0
   -1.1844   -2.8109    0.0000 C   0  0  0  0  0  0  0  0  0  0  0  0
   -1.1844   -1.9858    0.0000 C   0  0  0  0  0  0  0  0  0  0  0  0
   -1.8989   -4.0484    0.0000 O   0  0  0  0  0  0  0  0  0  0  0  0
   -2.6134   -4.4609    0.0000 C   0  0  0  0  0  0  0  0  0  0  0  0
   -3.3279   -4.0484    0.0000 C   0  0  0  0  0  0  0  0  0  0  0  0
   -4.0424   -4.4609    0.0000 O   0  0  0  0  0  0  0  0  0  0  0  0
   -4.7569   -4.0484    0.0000 C   0  0  0  0  0  0  0  0  0  0  0  0
   -5.4714   -4.4609    0.0000 C   0  0  0  0  0  0  0  0  0  0  0  0
   -6.1859   -4.0484    0.0000 N   0  0  0  0  0  0  0  0  0  0  0  0
  1  2  2  0      
  2  3  1  0      
  3  4  2  0      
  4  5  1  0      
  5  6  2  0      
  6  1  1  0      
  4  7  1  0      
  7  8  1  0      
  8  9  1  0      
  9 10  2  0      
 10  5  1  0      
  7 11  2  0      
  7 12  2  0      
  9 13  1  0      
 13 14  2  0      
 14 15  1  0      
 15 10  1  0      
 14 16  1  0      
 16 17  2  0      
 16 18  1  0      
 18 19  1  0      
 19 20  1  0      
 20 21  2  0      
 21 22  1  0      
 22 23  2  0      
 23 24  1  0      
 24 25  2  0      
 25 20  1  0      
  2 26  1  0      
 23 27  1  0      
 26 28  2  0      
 28 29  1  0      
 29 30  2  0      
 30 31  1  0      
 31 32  2  0      
 32 26  1  0      
 32 33  1  0      
 33 34  2  0      
 33 35  1  0      
 35 36  2  0      
 36 37  1  0      
 37 38  2  0      
 38 39  1  0      
 39 40  2  0      
 40 35  1  0      
 38 41  1  0      
 41 42  1  0      
 42 43  1  0      
 43 44  1  0      
 44 45  1  0      
 45 46  1  0      
 46 47  1  0      
M  END
